# Supplementary material for: Analysis of histological and microRNA profiles changes in rabbit skin development
Source: PubMed Central journal article supplement (PMC6965608; doi:10.1038/s41598-019-57327-5), 2020-01-16
Supplement: 41598_2019_57327_MOESM3_ESM.pdf [file 41598_2019_57327_MOESM3_ESM.pdf]

# **Analysis of histological and microRNA profiles changes in rabbit skin development**

**Haisheng Ding<sup>1</sup>, Guanglong Cheng<sup>1</sup>, JianJian Leng<sup>1</sup>, Yongxin Yang<sup>1</sup>, Xiaowei  
Zhao<sup>1</sup>, Xiaofei Wang<sup>1</sup>, Yunxia Qi<sup>1</sup>, Dongwei Huang<sup>1\*</sup>, Huiling Zhao<sup>1\*</sup>**

<sup>1</sup> Anhui Key Laboratory of Livestock and Poultry Product Safety Engineering,  
Institute of Animal Husbandry and Veterinary Medicine, Anhui Academy of  
Agricultural Sciences, Hefei, 230031, Anhui, People's Republic of China.

\* Correspondence and requests for materials should be addressed to D.H. (email:  
hdwscience@163.com) or H.Z. (email: zh11988@163.com).

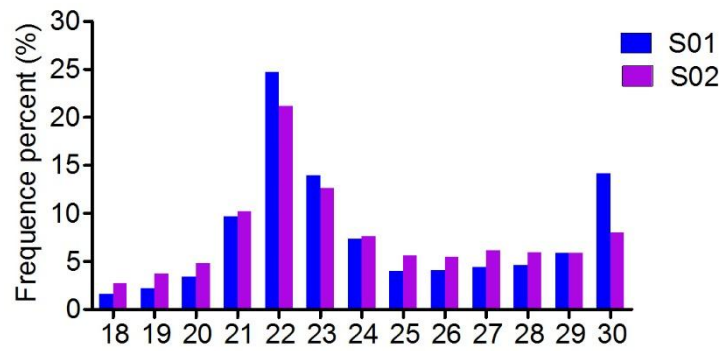

**Supplementary Figure S1** Read distribution analyses of sRNAs in the skin tissue of Wan strain Angora rabbits. S01 represents Wan strain Angora rabbits after plucking hairs at the first week when the hair follicles were in the telogen stage; S02 represents Wan strain Angora rabbits after plucking hairs at the eighth week when the hair follicles were in the anagen stage.

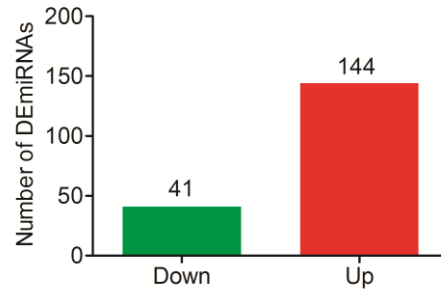

**Supplementary Figure S2** Analyses of DE miRNAs between the telogen and anagen stages.

**Supplementary Table S1** The number of reads mapping to rabbit reference genome from each sample. S01 represents the telogen stage; S02 represents the anagen stage.

| Samples | Total Reads | Mapped Reads       | Mapped reads (+) | Mapped reads (-) |
|---------|-------------|--------------------|------------------|------------------|
| S01     | 25,995,008  | 14,173,689 (54.5%) | 9,544,778        | 4,628,911        |
| S02     | 24,066,306  | 13,826,004 (57.4%) | 10,078,636       | 3,747,368        |

**Supplementary Table S2** The number of miRNAs in telogen and anagen stage, respectively. Known miRNAs, miRNAs matched to rabbit miRBase; Novel miRNAs, miRNAs unmapped to rabbit miRBase.

| Samples | Known miRNAs | Novel miRNAs | Total |
|---------|--------------|--------------|-------|
| S01     | 5            | 546          | 551   |
| S02     | 8            | 558          | 566   |
| Total   | 10           | 564          | 574   |

**Supplementary Table S3** The number of targets of the miRNAs.

| Types        | All miRNAs | miRNA with targets | Target genes |
|--------------|------------|--------------------|--------------|
| Known miRNAs | 10         | 10                 | 6046         |
| Novel miRNAs | 564        | 562                | 20554        |
| Total        | 574        | 572                | 20554        |

**Supplementary Table S4** The pathways regulated hair follicle development in Wan strain Angora rabbits.

| Pathways                        | Number of targets of DE miRNAs |
|---------------------------------|--------------------------------|
| TGF- $\beta$ signalling pathway | 84                             |
| MAPK signalling pathway         | 8                              |
| Wnt signalling pathway          | 123                            |
| ECM-receptor interaction        | 94                             |
| Apoptosis                       | 59                             |
| Fat digestion and absorption    | 29                             |
| Fatty acid metabolism           | 49                             |
| Notch signalling pathway        | 35                             |
| Hedgehog signalling pathway     | 52                             |

**Supplementary Table S5** Synthesis of conservative\_NC\_013672.1\_9290 and conservatative\_NC\_013675.1\_10734 sequences. NC, negative control.

| Sequence name                              | Sequence (5' $\rightarrow$ 3')                 |
|--------------------------------------------|------------------------------------------------|
| conservative_NC_013672.1_9290 mimic        | GCGGCGGCGGCGACUCCG<br>GAGUCGCCGCCGCCGUU        |
| conservative_NC_013672.1_9290 inhibitor    | GCGGCGGCGGCGACUCCG                             |
| conservatative_NC_013675.1_10734 mimic     | CGGCGGCGGCCGGGCGCA<br>CGCCCGGCCGCCGCCGUU       |
| conservatative_NC_013675.1_10734 inhibitor | CGGCGGCGGCCGGGCGCA                             |
| Negative control (NC)                      | UUCUCCGAACGUGUCACGUTT<br>ACGUGACACGUUCGGAGAATT |
| Inhibitor NC                               | CAGUACUUUUGUGUAGUACAA                          |

**Supplementary Table S6** Primers for qPCR. F<sup>1</sup>, forward primer; R<sup>2</sup>, reverse primer.

| Primers                                      | Sequences (5' → 3')          |
|----------------------------------------------|------------------------------|
| conservative_NC_013686.1_4992-F <sup>1</sup> | TATATTATAGGGGCGGGCGGGGCCGGC  |
| unconservative_NC_013669.1_6631-F            | TTAATACCTCCCGGGGCGGGGTGGGGG  |
| conservative_NC_013682.1_2909-F              | ATCGCAGGGGAAGTGACTTCTA       |
| conservative_NC_013675.1_10734-F             | ATTAATATTACGGCGGACGCCGGGCGCA |
| conservative_NC_013672.1_9290-F              | ATATATAGCGGCGGCGGCGACTCCG    |
| miRNA-R <sup>2</sup>                         | TAACGAGACGACGACAGAC          |
| U6-F                                         | CTCGCTTCGGCAGCACA            |
| U6-R                                         | AACGCTTCACGAATTTGCGT         |
| FGF5-F                                       | TGTGGCCTTGAACAAACGAG         |
| FGF5-R                                       | CTGCTCCGACTGCTTGAATC         |
| GAPDH-F                                      | GCCCTCAATGACCACTTTGT         |
| GAPDH-R                                      | TTACTCCTTGGAGGCCATGT         |
